# Supplementary material for: The Lamin-Like LITTLE NUCLEI 1 (LINC1) Regulates Pattern-Triggered Immunity and Jasmonic Acid Signaling
Source: Front Plant Sci. 2020 Jan 9;10:1639. doi: 10.3389/fpls.2019.01639 (PMC6963418; doi:10.3389/fpls.2019.01639)
Supplement: Supplementary file 2 [file Table_1.xlsx]

## Sheet: Sheet1
Table S1
Name	Sequence	Target gene	Purpose
qPCR
M0273	GGAAGTGGAAGCTCGGGAAA	AT1G67230	linc1-1 T-DNA insertion-F
M0274	CATTCACGCAAGTCCTCCCT	AT1G67230	linc1-1 T-DNA insertion-R
M0277	GAGCAGCAGACAGAAATCCG	AT1G67230	linc1-2 T-DNA insertion-F
M0278	GCACCGACTGCAGTTCCTAT	AT1G67230	linc1-2 T-DNA insertion-R
M0099	accacctgaaaggaagtacagtg	AT3g18780	Actin-F
M0100	ctgtgaacgattcctggacctgc	AT3g18780	Actin-R
M0171	GGCCTTGTATAATCCCTGATGA	At4g05320	UBQ10-F
M0172	AAAGAGATAACAGGAACGGAAA	At4g05320	UBQ10-R
M0163	ACTCTCCTCCAGGGGCTAAGGAT	AT5G46330	FLS2-F
M0164	AGCTAACAGCTCTCCAGGGATGG	AT5G46330	FLS2-R
M0165	ACGGGCATAGTTCCACAAAG	AT2G19190	FRK1-F
M0166	CGTCAAAAGAACGACGATGA	AT2G19190	FRK1-R
M0175	ACGGGGAAAACTTAGCCTGG	AT2G14610	PR1-F
M0176	TTGGCACATCCGAGTCTCAC	AT2G14610	PR1-R
ksk-155	ATCGTTGGAAATCGTGGTGT	AT3G57260	PR2-F
ksk-156	TCGGTGATCCATTCTTCACA	AT3G57260	PR2-R
M0333	CTATGGAGGCGCAGGAGAAG	AT1G33960	AIG1-F
M0334	GCTTCCATTTCAGCACGCAT	AT1G33960	AIG1-R
M0339	GAGCAAAGAGACGATCAGGGT	AT1G02450	NIMIN1-F
M0340	CTCGTCTACGTTTCCGTGCT	AT1G02450	NIMIN1-R
M0179	TGGCGGATTTCATGTCGGAA	AT4G37770	ACS8-F
M0180	GTCTCGTTAGCCGGAGTAGC	AT4G37770	ACS8-R
M0199	GGGTCTTGCTGAAAACCAGC	AT4G08040	ACS11-F
M0200	AGCTGGCAAGCCATGGTAAT	AT4G08040	ACS11-R
HA258	TAATTCCGGTGAACCTGACC	AT5G47220	ERF2-F
HA259	CACGTGTCTCATCACCAACC	AT5G47220	ERF2-R
HA318	GAAAACCGCCGTTGAAGATC	AT4G17490	ERF6-F
HA319	CGGTTGCGAATTGAATCCA	AT4G17490	ERF6-R
M0207	ACGCTGCTCTTGTTCTCTTTG	AT2G26020	PDF1.2b-F
M0208	TGGCTTCTCGCACAACTTCT	AT2G26020	PDF1.2b-R
AZ324	TCCGAGTCCGGTTCATTCT	AT1G32640	MYC2-F
AZ325	TCTCGGGAGAAAGTGTTATTGAA	AT1G32640	MYC2-R
M0341	GCATCTCATACTCAAGCCAAACG	AT5G24780	VSP1-F
M0342	TCCTCAACCAAATCAGCCCA	AT5G24780	VSP1-R
M0347	GCTCGGGATTGAACCCATCA	AT5G24770	VSP2-F
M0348	TTCGAACCATTAGGCTTCAATATG	AT5G24770	VSP2-R
M0447	ATGGGGACCGGTTTTGACTC	AT2G27690	CYP94C1-F
M0448	GGAATCGAATTGAACCGGCG	AT2G27690	CYP94C1-R
M0627	GGACTGTGGAGAGACGGTTG	AT5G63450	CYP94B1-F
M0628	CAATCCGGATCCCAACCCAA	AT5G63450	CYP94B1-R
M0629	CGGACATGTGGTACAATCTTGG	AT5G05600	JAO2-F
M0630	CAGCCTTCTCACATTCCCCA	AT5G05600	JAO2-R
M0631	TTGGCTAGATGCTGAGCAATTC	AT3G55970	JAO3-F
M0632	GGGTTCACGATCACTCTGTG	AT3G55970	JAO3-R
M0633	ACATTGGAGATCAACTTCAGGT	AT2G38240	JAO4-F
M0634	ACAAAGCAAAACAAATAGACTTTCG	AT2G38240	JAO4-R
M0391	TTCTGAGTTCGTCGGTAGCC	AT1G19180	JAZ1-F
M0392	AGGCTTGCATGCCATTCCTA	AT1G19180	JAZ1-R
M0393	TGGAGAGAGATTTTCTCGGGT	AT3G17860	JAZ3-F
M0394	CATTCCTCTGTTGGGAGCTGA	AT3G17860	JAZ3-R
M0399	GCTCAGCCGTTACTTGAAGG	AT1G17380	JAZ5-F
M0400	TGTTTCCCTGGTGGATCGAA	AT1G17380	JAZ5-R
M0403	TAACGAGCCAACGAGTTCCG	AT1G72450	JAZ6-F
M0404	CTAGCCACAGCCCTGTCTTT	AT1G72450	JAZ6-R
M0405	CGGTTCGGATCCTCCAACAA	AT2G34600	JAZ7-F
M0406	ACGGTGGTAAGGGGAAGTTG	AT2G34600	JAZ7-R
M0499	CGGGTCTTAAGTAATTAGCC	AT5G60890	MYB34-F
M0500	AAGAAAGGAGCTTGGACTCC	AT5G60890	MYB34-R
M0501	CAATACTGGAGGAGGATATAACC	AT5G07690	MYB29-F
M0502	AGTTCTTGTCGTCATAATCTTGG	AT5G07690	MYB29-R
M0503	TCCCTGACAAATACTCTTGCTGAT	AT5G61420	MYB28-F
M0504	CATTGTGGTTATCTCCTCCGAATT	AT5G61420	MYB28-R
M0491	TCAGGACTCCCAGACTCGTT	AT5G07700	MYB76-F
M0492	TGTGGGAAATCATACTCGGGG	AT5G07700	MYB76-R
M0495	CACGCCATTCATGGCAACAA	AT1G74080	MYB122-F
M0496	GGGATTTGTGGGTCAACGGA	AT1G74080	MYB122-R
M0167	ACAAATGGTCTGCTATAGCT	AT1G18570	MYB51-F
M0168	CTTGTGTGTAACTGGATCAA	AT1G18570	MYB51-R
M0475	TATGTCCCTTCCCATCTTGCG	AT1G16410	CYP79F1-F
M0476	GGTTACGACCTAGTCCAGGG	AT1G16410	CYP79F1-R
M0477	GCGCTCATTATGTCCCACCT	AT1G16400	CYP79F2-F
M0478	TTTTAGGGTTCCGGCCTAGC	AT1G16400	CYP79F2-R
M0505	TTTGATGGATTGTCTGGCGC	AT4G39950	CYP79B2-F
M0506	CAAAGACGAACAAGGCAACC	AT4G39950	CYP79B2-R
M0507	CGGTTTGTTTATCATCTCCGC	AT2G22330	CYP79B3-F
M0508	TTGCTTACCGCTGATGAAATC	AT2G22330	CYP79B3-R
M0509	TTCAAGAGGTTGTCAATGAGACGC	AT4G13770	CYP83A1-F
M0510	CTACAATATCCAAGATGACGGCTTT	AT4G13770	CYP83A1-R
M0511	TCCGACCTTTTCCCTTATTTCG	AT4G31500	CYP83B1-F
M0512	TTGAGACGTGCACTGAGACCAG	AT4G31500	CYP83B1-R
